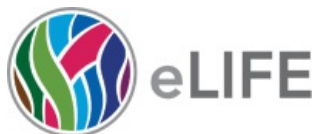

24 Hills Road, P 01223 855346  
Cambridge W [elifesciences.org](http://elifesciences.org)  
CB2 1JP T [@elifesciences](mailto:@elifesciences)

## FOR PEER REVIEW - CONFIDENTIAL

### eLife reviews are now Public Reviews

Beginning in December 2020, eLife is changing our editorial process to emphasize the production of **clear, transparent public reviews** of papers already published as **preprints** that will transform unrefereed author manuscripts into publicly accessible **refereed preprints**.

In doing so, our goal is not simply to take existing peer reviews and post them online. Rather we want to change how we construct and write peer reviews to make them useful to both authors and readers in a way that better reflects the work you as a reviewer put into reading and thinking about a paper.

eLife reviews now have three parts:

- An **evaluation summary** that is a concise summary of your assessment of the work's major strengths and weaknesses in general terms and its likely impact.
- A **public review** that details the strengths and weaknesses of the manuscript before you, and discusses whether the authors' claims and conclusions are justified by their data.
- A set of private **recommendations for the authors** that outline how you think the science and its presentation could be strengthened.

All three sections will be used as the basis for an eLife publishing decision, which will, as always, be made after a consultation among the reviewers and editor. The two public sections will then be published alongside the preprint, along with a response from the authors if they choose (in the case of papers we reject after review, the authors can choose to delay posting until their paper is published elsewhere).

If this is your first time going through this new process, we ask that you take some time to read our [Reviewer Guide](#), which discusses how we see each section will be used, what it should contain, and what we hope it accomplishes. And we remind you that, with the shift of reviews from private correspondence to public discourse, it is more important than ever that reviews are written in a **clear and constructive manner** appropriate for a public audience and mindful of the impact language choices might have on the authors.

### Information about the manuscript

#### The CoLab-score rapidly and efficiently excludes COVID-19 at the emergency department without need for SARS-CoV-2 testing: a multicenter case-control study

Tracking no: 10-03-2021-RA-eLife-68276

**Impact statement:** The CoLab-score can rapidly and safely exclude a possible COVID-19-infection in patients presenting at the ER, based on ten routine laboratory tests and age.

**Competing interests:** No competing interests declared

#### Author contributions:

Arjen-Kars Boer: Conceptualization; Resources; Data curation; Formal analysis; Supervision; Validation; Investigation; Visualization; Methodology; Writing - original draft; Writing - review and editing Ruben Deneer: Conceptualization; Data curation; Software; Formal analysis; Validation; Visualization; Methodology; Writing - original draft; Writing - review and editing Maaikje Maas: Conceptualization; Supervision; Writing - review and editing Heidi Ammerlaan: Conceptualization; Resources; Supervision; Writing - review and editing Roland van Balkom: Conceptualization; Supervision; Writing - review and editing Mathie Leers: Resources; Data curation; Validation; Writing - review and editing Remy Martens: Resources; Data curation; Validation; Writing - review and editing Madelon Buijs: Resources; Data curation; Validation; Writing - review and editing Jos Kerremans: Resources; Data curation; Validation; Writing - review and editing Muriël Messchaert: Resources; Data curation; Validation; Writing - review and editing Jeroen van Suijlen: Resources; Data curation; Validation; Writing - review and editing Natal van Riel: Resources; Supervision; Methodology; Writing - review and editing Volkher Scharnhorst: Conceptualization; Resources; Supervision; Project administration; Writing - review and editing

**NOTE: This preprint reports new research that has not been certified by peer review and should not be used to guide clinical practice.**

**Funding:**

The funders had no role in study design, data collection and interpretation, or the decision to submit the work for publication.

**Data Availability:**

Source data to generate figures and tables is provided. It is however, not possible to provide the development dataset used to fit the model since this contains patient data which is subject to EU GDPR regulation. Therefore the source data for Table 1 is split into categories and ordered to prevent patient re-identification. If an interested researcher would like to obtain access to the development dataset, an e-mail to the manager of the data (arjen-kars.boer@catharinaziekenhuis.nl) with a research proposal would have to be sent. This proposal will be reviewed by the hospital IRB.

N/A

**Ethics:**

Human Subjects: Yes Ethics Statement: The study was reviewed by the Medical research Ethics Committees United (MEC-U) under study number W20.071, which confirmed that the Medical Research Involving Human Subjects Act (In Dutch: WMO) does not apply to this study. The study was thereafter reviewed and approved by the internal hospital review board. Clinical Trial: No Animal Subjects: No

1 **The CoLab-score rapidly and efficiently excludes COVID-19 at the**  
2 **emergency department without need for SARS-CoV-2 testing: a**  
3 **multicenter case-control study**

4  
5 Arjen-Kars Boer<sup>1,2\*</sup>, Ruben Deneer<sup>1,2,3\*†</sup>, Maaïke Maas<sup>4</sup>, Heidi S. M. Ammerlaan<sup>5</sup>, Roland H. H. van  
6 Balkom<sup>6</sup>, Mathie P. G. Leers<sup>7</sup>, Remy J.H. Martens<sup>7</sup>, Madelon M. Buijs<sup>8</sup>, Jos J. Kerremans<sup>9</sup>, Muriël  
7 Messchaert<sup>10</sup>, Jeroen D.E. van Suijlen<sup>10</sup>, Natal A.W. van Riel<sup>2,3</sup> and Volkher Scharnhorst<sup>1,2,3</sup>

8

9 \* Both authors contributed equally

10 † Corresponding author

11

12 1 Department of Laboratory Medicine, Catharina Hospital Eindhoven, Michelangelolaan 2,  
13 5623 EJ, Eindhoven, the Netherlands

14 2 Expert Center Clinical Chemistry Eindhoven, Michelangelolaan 2, 5623 EJ, Eindhoven,  
15 the Netherlands

16 3 Faculty of Biomedical Engineering, Technical University Eindhoven, Groene Loper 3,  
17 5612 AE, Eindhoven, the Netherlands

18 4 Department of Emergency Medicine, Catharina Hospital Eindhoven, Michelangelolaan 2,  
19 5623 EJ, Eindhoven, the Netherlands

20 5 Department of Internal Medicine, Catharina Hospital Eindhoven, Michelangelolaan 2,  
21 5623 EJ, Eindhoven, the Netherlands

22 6 Department of Pulmonary Diseases, Catharina Hospital Eindhoven, Michelangelolaan 2,  
23 5623 EJ, Eindhoven, the Netherlands

24 7 Department of Laboratory Medicine, Zuyderland Medical Center, Dr. H. van der  
25 Hoffplein 1, 6162 BG, Sittard-Geleen, the Netherlands

26        8        Atalmedial Diagnostic Centers, Jan Tooropstraat 138, 1061 AD Amsterdam, the  
27                    Netherlands  
28        9        Department of Medical Microbiology & Infection Prevention, Alrijne Hospital, Simon  
29                    Smitweg 1, 2353 GA Leiderdorp, the Netherlands  
30        10        Department of Clinical Chemistry, Gelre Hospital, Albert Schweitzerlaan 31, 7334 DZ  
31                    Apeldoorn, the Netherlands

32

33    Corresponding author details

34    Ruben Deneer

35    Michelangelolaan 2

36    5623 EJ Eindhoven

37    +31 (0)40 239 9111

38    [ruben.deneer@catharinaziekenhuis.nl](mailto:ruben.deneer@catharinaziekenhuis.nl)

39 **Abstract**

40 *Background*

41 Rapid identification of emergency department (ED) patients with a possible COVID-19 infection is  
42 needed. PCR-testing all ED patients is neither feasible nor effective in most centers, therefore a rapid,  
43 objective, low-cost screening tool to triage ED patients is necessary.

44 *Methods*

45 Results from all routine lab tests from ED patients at the Catharina Hospital were collected from July  
46 2019 to July 2020 and used in a statistical model to obtain the CoLab-score. The score was validated  
47 temporally and externally in three independent centers.

48 *Results*

49 The CoLab-score consists of 10 routine lab results and can be used to safely rule-out a COVID-19  
50 infection in more than one third of ED presentations with a negative predictive value of 0.997 (95%  
51 CI: 0.994 – 0.999) .

52 *Conclusions*

53 The CoLab-score is a valuable tool to rule out COVID-19, guide PCR testing and is available to any  
54 center with access to routine laboratory tests.

## 55 Introduction

56 A global pandemic caused by a novel virus like severe acute respiratory syndrome coronavirus 2  
57 (SARS-CoV-2) disrupts society, the health system and hospitals in particular. Initially, little was  
58 known about the virus, its transmission, the diagnostic possibilities and treatment options. Combined  
59 with limited awareness in the community, the virus spread swiftly, resulting in exponential growth of  
60 infected patients. Interventions like social distancing and face masks subsequently resulted in a decline  
61 in prevalence of the virus. But after a low prevalence at the start of the summer, there was a revival of  
62 the virus in the fall, resulting in a second wave (“Coronavirus Disease (COVID-19) Situation  
63 Reports,” n.d.). Faced with novel mutations in SARS-CoV-2, in many countries a third wave is very  
64 likely to occur. In all phases of the outbreak, emergency departments (EDs) faced different diagnostic  
65 challenges. Often, the capacity of the SARS-CoV-2 RNA PCR testing facility was limited and patient  
66 care was delayed due to the long turnaround time of centralized PCR facilities. Shortly after the first  
67 wave, rapid SARS-CoV-2 tests became available, potentially reducing the diagnostic phase to less  
68 than 1 hour.

69 Prediction models that reliably identify ED patients eligible for PCR testing, or safely rule-out patients  
70 without coronavirus disease 2019 (COVID-19), are desirable. Moreover, if only routine laboratory  
71 results are required as input, a model could potentially reduce diagnostic costs and accelerate triaging  
72 of patients. In the era of algorithms and artificial intelligence, it is very appealing to develop predictive  
73 or diagnostic tools based on information readily available. In fact, models have been developed to  
74 identify SARS-CoV-2-positive patients (Brinati et al., 2020; Fink et al., 2020; Giamello et al., 2020;  
75 Joshi et al., 2020; Kurstjens et al., 2020; Plante et al., 2020; Qin et al., 2020; Tordjman et al., 2020), to  
76 describe the severity of COVID-19 symptoms or to predict deterioration or ultimately admission at the  
77 intensive care unit (Linssen et al., 2020; Wang et al., 2020; Zeng et al., 2021; Zhou et al., 2020). For  
78 an extensive overview and critical appraisal of models developed for COVID-19 we refer to the living  
79 systematic review by Wynants et. al (Wynants et al., 2020). However, only few models found their  
80 way into routine care at the ED (Albahri et al., 2020; Hooli and King, 2020). Early models were based  
81 on relatively small sample sizes, were hampered by selection bias or required features that could not

82 be acquired automatically. Furthermore, models are easily over-fitted by selecting too many features,  
83 resulting in models that could not be used outside the strict inclusion criteria (Albahri et al., 2020;  
84 Hooli and King, 2020; Wynants et al., 2020). Models developed on a population of PCR-tested  
85 patients, cannot be used to guide clinicians to decide for PCR testing, as the clinical considerations to  
86 request PCR testing are not taken into account. In addition, when volume and speed are important,  
87 also composite models requiring data from other diagnostic tools like a CT scan (COVID-19 CO-  
88 RADS classification) (Lessmann et al., 2021) or X-ray (Kurstjens et al., 2020) are hard to implement  
89 in routine care.

90 In this study we report on the development and validation of a prediction model that, based on routine  
91 laboratory tests, estimates the risks of a patient presenting at the ED for testing positive for COVID-  
92 19. The model can be used during high and low prevalence (“waves”) of COVID-19. Since the model  
93 was successfully validated externally, it can be used clinically to reduce the number of PCR tests,  
94 exclude COVID-19 in patients and identify patients with a high risk of being SARS-CoV-2 positive,  
95 even if the patients are asymptomatic.

## 96 **Methods**

### 97 *Study design*

98 Routine laboratory results combined with age and gender from all patient presenting at the emergency  
99 department (ED) of the Catharina Hospital Eindhoven from July 2019 to July 2020 were combined  
100 with SARS-CoV-2 PCR test results in a development dataset. A model that could predict the presence  
101 of a COVID-19 infection was fit to this dataset. Performance of the model was assessed by 1) internal  
102 validation using bootstrapping, 2) temporal validation by using data from all patients presenting at the  
103 ED of the Catharina Hospital from July 2020 to November 2020, and 3) external validation by using  
104 data from the ED of three other hospitals in the Netherlands. The study was reviewed by the Medical  
105 research Ethics Committees United (MEC-U) under study number W20.071, which confirmed that the  
106 Medical Research Involving Human Subjects Act (In Dutch: WMO) does not apply to this study. The  
107 study was thereafter reviewed and approved by the internal hospital review board.

108

### 109 *Development dataset*

110 All ED patient presentations of the Catharina Hospital Eindhoven from July 2019 to July 2020 were  
111 included in the development dataset, provided that routine laboratory testing had been requested by the  
112 attending physician. The routine laboratory panel at the ED consists of 28 laboratory tests. However,  
113 in some cases not all tests in the routine panel were requested or one or more quantitative results were  
114 not available due to analytical interference (hemolysis, lipemia or icterus). Presentations with missing  
115 values in the routine panel were excluded. Presentations with one or more extreme lab results ( $> 10$   
116 times standard deviation) were also excluded. After the first case of COVID-19 in the Netherlands (28  
117 February 2020) all patients with symptoms of COVID-19 (either fever and/or respiratory symptoms)  
118 were subjected to nasopharyngeal PCR testing for SARS-CoV-2 RNA. PCR testing was performed by  
119 commercial tests that were approved by the Dutch national institute of public health (RIVM). If a  
120 patient had a positive PCR result in the past, subsequent presentations were excluded as re-  
121 presentations might be clinically different from de novo presentations.



122 The ED routine lab panel results were merged with SARS-CoV-2 PCR results if the underlying nose  
123 or throat swap had been taken  $\leq 1$  day prior, or  $\leq 1$  week after initial blood withdrawal at the ED. If  
124 multiple PCR tests were performed in this window and at least one PCR test was positive, the  
125 presentation was labelled “*PCR-positive*”. If all PCR test results in the time window were negative, the  
126 presentation was labelled as “*PCR-negative*”. If no PCR tests were performed in the time window but  
127 the presentation occurred after the first case of COVID-19 in the Netherlands, the presentation was  
128 labelled as “*Asymptomatic*”. All presentations before the first case in our center were labelled as “*Pre-*  
129 *COVID-19*”.

130

### 131 *Laboratory tests*

132 The routine laboratory panel consisted of hemocytometric and chemical analyses. In the Catharina  
133 hospital, the hemocytometric tests were performed on Sysmex XN-10 instruments (Sysmex Corp.,  
134 Kobe, Japan) and consisted of hemoglobin, hematocrit, erythrocytes, mean corpuscular volume  
135 (MCV), mean cellular hemoglobin (MCH), mean cellular hemoglobin concentration (MCHC),  
136 thrombocytes, leukocytes, neutrophils, eosinophils, basophils, lymphocytes and monocytes. The  
137 chemical analyses were performed on a Cobas 8000 Pro (Roche Dx, Basel, Switzerland) instrument  
138 and consisted of glucose, total bilirubin, aspartate aminotransferase (ASAT), alanine aminotransferase  
139 (ALAT), lactate dehydrogenase (LD), creatine kinase (CK), alkaline phosphatase (ALP), gamma-  
140 glutamyltransferase (gGT), blood urea nitrogen (BUN), creatinine, CKD-epi estimated glomerular  
141 filtration rate (eGFR), potassium, sodium, chloride, albumin (bromocresol green) and C-reactive  
142 protein (CRP). These results were combined with age and gender.

143

### 144 *Modelling*

145 All data were processed and analyzed in R version 4.0.3 (R Core Team, 2020). Laboratory results,  
146 combined with age and gender were used as covariates in the model. Cases were ED presentations  
147 labelled as “*PCR-positive*”, controls as “*PCR-negative*”, “*Asymptomatic*” or “*Pre-COVID-19*”. To

148 minimize additional missing data, all non-numeric results at the extremes of the measuring range, were  
149 converted to numeric results by removing the “<” and “>” signs. For eGFR (CKD-epi) and CRP this  
150 caused a discontinuous distribution. Therefore, instead of random sampling for eGFR (CKD-epi) and  
151 CRP the raw precursor value was used instead of >90 ml/min/m<sup>2</sup> and <6 mg/L, respectively.  
152 Considering that laboratory results of bilirubin, ASAT, ALAT, LD, CK, AF and gGT can have heavy  
153 (right) tailed distributions, which in turn impacts model predictions, these variables were transformed  
154 logarithmically.

155 To achieve predictive accuracy, limit overfitting and emphasize sparsity, adaptive lasso regression was  
156 chosen (Tibshirani, 1996; Zou, 2006). Prior to model fitting, covariates were scaled to zero mean and  
157 unit variance, after model fitting coefficients were unscaled to obtain regression coefficients on the  
158 original scale. In adaptive lasso, weights are applied to each of the covariates present in the lasso  
159 constraint, the weight vector has to be calculated before the adaptive lasso regression is performed.  
160 Due to multicollinearity between laboratory tests in the routine lab panel, weights in the adaptive lasso  
161 were based on ridge regression estimates ( $\hat{\beta}_{ridge}$ ) as recommended by Zou (Zou, 2006). To obtain  
162  $\hat{\beta}_{ridge}$  the optimal penalty ( $\lambda$ ) for the ridge regression was chosen using 10 fold cross-validation (CV)  
163 with area under the ROC curve (AUC) as the loss function. The  $\lambda$  corresponding to the maximum  
164 AUC was selected to obtain  $\hat{\beta}_{ridge}$ . The weight vector ( $\hat{w}$ ) was calculated by  $\hat{w} = 1/|\hat{\beta}_{ridge}|^2$ . This  
165 weight vector was then used to fit an adaptive lasso regression where  $\lambda$  was chosen by the criterion  $\pm 1$   
166 SE of the maximum AUC. All models were fitted using the glmnet-package (Friedman et al., 2010).

167 Since this is a retrospective case-control study, the sample prevalence may not reflect the true/current  
168 prevalence, as is the case with COVID-19. Therefore the intercept term in the model must be adjusted  
169 according to the actual prevalence (if known, or estimated) to obtain well-calibrated probabilities  
170 (King and Zeng, 2001).

171

172 *CoLab-score*

173 Since manually updating the intercept term is not straightforward to implement in clinical practice, we  
174 developed the CoLab-score. The CoLab-score is a categorization of the linear predictor into a CoLab-  
175 score ranging from 0 to 5, where score 0 reflects low risk for COVID-19 and score 5 reflects high risk.  
176 The CoLab-score is based on a fixed number needed to test of 15, this implies that one is willing to  
177 test 15 patients to find one positive. A number needed to test of 15 corresponds to a threshold  
178 probability of  $1/15 = 0.067$ , on the linear predictor (or log-odds) scale, this corresponds to a threshold  
179 of  $\text{logit}(0.067) = -2.639$ . This threshold is correct when the sample prevalence matches the actual  
180 prevalence. In reality the prevalence of COVID-19 in the ED varies, therefore thresholds are  
181 calculated for prevalence cut-points of 1%, 2%, 5%, 10% and 40% using the intercept adjustment  
182 formula by King (King and Zeng, 2001). The intervals obtained through these breaks correspond to  
183 CoLab-scores 5 to 0, respectively. The CoLab-score can thus be used as a “prevalence-dependent  
184 binary classification” (either positive or negative). If COVID-19 prevalence at the ED in the previous  
185 week is  $<1\%$ , only CoLab-score 5 should be classified as positive and CoLab-score 0 till 4 as negative.  
186 If prevalence is  $1\% - 2\%$ , CoLab-score 4 and 5 should be classified as positive and 1 – 3 negative.  
187 Similarly, with a prevalence of  $2 - 5\%$  the split is between CoLab-score 2 and 3 and with prevalence  
188 of  $5 - 10\%$  between CoLab-score 1 – 2. If the prevalence is higher than 10% only CoLab-score 0 is  
189 classified as negative. Using the CoLab-score in this fashion, aims to preserve a number need to test of  
190 15.

191

192 *Internal validation*

193 To assess model performance while taking overfitting into account, bootstrapping was performed.  
194 1000 bootstrap samples were generated from the original data. On each bootstrap sample, the full  
195 model fitting procedure and CoLab-score conversion were performed. Optimism adjusted performance  
196 measures of the CoLab-score were obtained by applying the 0.632 bootstrap rule to the in-sample and  
197 out-of-bag-sample performance (Efron, 1983). Performance measures included, AUC, sensitivity,  
198 specificity, positive predictive value (PPV) and negative predictive value (NPV) of each CoLab-score.

199 The pROC-package was used to calculate performance measures (Robin et al., 2011). The  
200 performance of the prevalence dependent binary CoLab-classification was evaluated in terms of  
201 overall sensitivity and specificity, and potential reduction in the number of PCR-tests. Although the  
202 full inclusion period from July 2019 to July 2020 was used for model fitting, the performance was  
203 evaluated on the period starting from the first COVID-19 infection (24<sup>th</sup> of February 2020) to July  
204 2020. This was done to obtain performance measures that would reflect real world performance during  
205 COVID-19 waves.

206

### 207 *Temporal validation*

208 For temporal validation, results from our center were prospectively analyzed from July 2020 to  
209 November 2020. During this period, a second wave of COVID-19 infections developed. In this period  
210 there was also more widespread external PCR testing by municipal health services (In Dutch: GGD).  
211 Since the results of external conducted PCR tests were not available to our study, the outcome in the  
212 temporal validation cohort was chosen as a composite of the hospital registration of a confirmed  
213 COVID-19 infection or at least one positive PCR test results in the hospital (with the same time  
214 window as described above). The temporal validation consisted of assessing the AUC, sensitivity,  
215 specificity, PPV and NPV of each CoLab-score threshold. Calibration was assessed graphically by  
216 converting the CoLab-linear predictor to the predicted probability (through the inverse logit function)  
217 and plotting the proportion of observed outcomes versus expected probabilities. The rms-package was  
218 used to generate calibration plots (Harrell Jr, 2021).

219

### 220 *External validation*

221 For the external validation, several centers in the Netherlands were approached and asked if they  
222 collected the required panel of laboratory tests and had access to SARS-CoV-2 PCR test results. Seven  
223 centers responded and the three centers with the least inclusion bias (i.e. measuring routinely all  
224 laboratory tests underlying the CoLab-score for large unselected patient groups) were Gelre Hospitals

225 (center 1), Atalmedial Diagnostic Centers, location Alrijne Hospital Leiderdorp (center 2) and  
226 Zuyderland Medical Center (center 3). The hematological parameters were measured with Sysmex  
227 XN10/XN20 (center 1), CELL-DYN-Sapphire (Abbott Laboratories) (center 2) and Sysmex XN10  
228 instruments (center 3). The clinical chemistry parameters were measured with Architect  
229 c14100/c160000 (Abbott Laboratories) (center 1), Architect ci4100 (Abbott Laboratories) (center 2)  
230 and Cobas 8000 instruments (Roche Dx) (center 3). The external validation was similar to the  
231 temporal validation and consisted of assessing the AUC sensitivity, specificity, PPV and NPV of each  
232 CoLab-score threshold. Calibration was assessed graphically analogous to the temporal validation  
233 dataset. In addition, the distributions of the variables in the CoLab-scores was plotted for all control  
234 (i.e. negative) patients to determine if there were any systematic differences that could cause bias in  
235 the CoLab-score predictions.

## 236 Results

### 237 Development dataset

238 For model building, 12.879 emergency department (ED) presentations of 10.327 patients from July  
 239 2019 to July 2020 were included. After excluding cases with an incomplete lab panel, patient  
 240 presentations that occurred after a positive PCR test in the past (re-presentations) and presentations  
 241 with extreme values (>10 times standard deviation) in any of the lab results, 10.417 presentations of  
 242 8610 patients remained (**Figure 1A**).

243

### 244 Figure 1: Inclusion flow of patients in the development (A) and temporal validation (B) dataset.

245 All patient admissions with routine venous blood sampling at the emergency department (ED) were  
 246 included. For the development dataset, completeness of the lab panel was assessed for all the 29  
 247 laboratory tests (see Table 1), for the temporal validation dataset this was only necessary for 10  
 248 laboratory tests (see Table 2). The major causes of missingness are described in the text. In the  
 249 development dataset, presentations with extreme values (>10 SD) were excluded. The same limits  
 250 were applied to the temporal validation dataset (see Table 2 for limits).

251

|                      | Pre-COVID-19<br>(N = 5890) | Asymptomatic<br>(N = 3303) | PCR negative<br>(N = 945) | PCR positive<br>(N = 279) |
|----------------------|----------------------------|----------------------------|---------------------------|---------------------------|
| Age in years         | 61 (21)                    | 60 (21)                    | 66 (18)                   | 69 (15)                   |
| Female gender        | 2909 (49.4 %)              | 1659 (50.2 %)              | 466 (49.3 %)              | 95 (34.1 %)               |
| Hemoglobin in mmol/L | 8.2 (1.3)                  | 8.3 (1.3)                  | 8.2 (1.4)                 | 8.6 (1.1)                 |
| Hematocrit in L/L    | 0.403 (0.059)              | 0.405 (0.056)              | 0.405 (0.062)             | 0.417 (0.047)             |
| Erythrocytes /pL     | 4.41 (0.69)                | 4.43 (0.66)                | 4.41 (0.72)               | 4.61 (0.60)               |
| MCV in fl            | 91.8 (6.4)                 | 91.9 (6.1)                 | 92.4 (6.7)                | 90.7 (5.5)                |
| MCH in mmol          | 1.859 (0.157)              | 1.876 (0.150)              | 1.874 (0.172)             | 1.869 (0.141)             |
| MCHC in mmol/L       | 20.2 (0.9)                 | 20.4 (0.9)                 | 20.3 (1.0)                | 20.6 (0.8)                |
| Thrombocytes /nL     | 263 (99)                   | 266 (100)                  | 269 (105)                 | 217 (123)                 |
| Leukocytes /nL       | 9.30 [7.06, 12.16]         | 8.92 [7.01, 11.89]         | 9.66 [7.17, 12.94]        | 6.33 [4.74, 8.48]         |
| Neutrophils /nL      | 6.62 [4.51, 9.53]          | 6.10 [4.42, 8.94]          | 7.01 [4.79, 10.02]        | 4.71 [3.30, 6.94]         |
| Eosinophils /nL      | 0.09 [0.03, 0.17]          | 0.09 [0.03, 0.18]          | 0.08 [0.02, 0.17]         | 0.00 [0.00, 0.02]         |
| Basophils /nL        | 0.04 [0.02, 0.05]          | 0.04 [0.02, 0.05]          | 0.04 [0.02, 0.05]         | 0.01 [0.01, 0.02]         |
| Lymphocytes/nL       | 1.47 [0.93, 2.13]          | 1.56 [1.05, 2.18]          | 1.31 [0.80, 2.03]         | 0.86 [0.59, 1.21]         |
| Monocytes /nL        | 0.70 [0.52, 0.93]          | 0.69 [0.52, 0.91]          | 0.74 [0.54, 1.01]         | 0.45 [0.32, 0.64]         |
| Glucose in mmol/L    | 6.76 [5.83, 8.39]          | 6.68 [5.76, 8.14]          | 6.98 [5.95, 8.85]         | 6.77 [5.98, 8.48]         |
| Bilirubin in μmol/L  | 7.5 [5.0, 11.6]            | 7.4 [5.1, 10.9]            | 8.3 [5.6, 12.4]           | 8.2 [6.3, 11.4]           |
| ASAT in U/L          | 24.0 [19.1, 32.2]          | 26.5 [21.6, 35.1]          | 27.7 [21.7, 39.2]         | 40.7 [30.2, 57.2]         |

|                                  | <b>Pre-COVID-19<br/>(N = 5890)</b> | <b>Asymptomatic<br/>(N = 3303)</b> | <b>PCR negative<br/>(N = 945)</b> | <b>PCR positive<br/>(N = 279)</b> |
|----------------------------------|------------------------------------|------------------------------------|-----------------------------------|-----------------------------------|
| ALAT in U/L                      | 24.3 [17.8, 35.3]                  | 25.3 [18.4, 36.2]                  | 25.7 [18.4, 40.0]                 | 33.7 [23.3, 50.0]                 |
| LD in U/L                        | 201 [173, 240]                     | 198 [170, 236]                     | 215 [178, 263]                    | 300 [238, 403]                    |
| CK in U/L                        | 82 [51, 134]                       | 83 [52, 136]                       | 76 [51, 125]                      | 124 [62, 222]                     |
| AF in IU/L                       | 83.0 [68.0, 105.0]                 | 81.0 [65.8, 102.5]                 | 86.9 [67.9, 110.0]                | 71.0 [58.8, 85.0]                 |
| gGT in U/L                       | 27.0 [17.0, 53.0]                  | 28.4 [18.4, 50.5]                  | 37.0 [22.4, 68.9]                 | 42.0 [28.0, 83.5]                 |
| BUN in mmol/L                    | 5.7 [4.3, 8.0]                     | 5.8 [4.3, 7.8]                     | 6.2 [4.6, 9.4]                    | 6.1 [4.7, 8.9]                    |
| CKD-epi in ml/min/m <sup>2</sup> | 80.9 [58.0, 99.1]                  | 85.0 [63.5, 103.3]                 | 79.1 [52.1, 96.6]                 | 76.6 [54.9, 91.2]                 |
| Creatinine in μmol/L             | 79 [64, 100]                       | 74 [61, 94]                        | 78 [62, 105]                      | 82 [68, 104]                      |
| Potassium in mmol/L              | 4.06 (0.50)                        | 4.03 (0.49)                        | 4.07 (0.55)                       | 3.91 (0.47)                       |
| Sodium in mmol/L                 | 139.2 (4.0)                        | 138.5 (3.9)                        | 138.0 (4.3)                       | 136.4 (4.1)                       |
| Chloride in mmol/L               | 104.4 (4.6)                        | 103.8 (4.5)                        | 102.9 (4.8)                       | 101.6 (4.4)                       |
| Albumin in g/L                   | 42.4 (4.9)                         | 42.3 (4.5)                         | 40.8 (4.8)                        | 38.4 (3.8)                        |
| CRP in mg/L                      | 8 [2, 41]                          | 5 [1, 30]                          | 18 [3, 69]                        | 77 [37, 136]                      |

252

253 **Table 1: Descriptive statistics of development dataset and laboratory concentrations.**

254 *Shown are the laboratory tests routinely requested at ED presentation and their mean/median results*

255 *(in the development dataset) for the presentations before the first COVID-19 patient in the*

256 *Netherlands (“Pre-COVID-19”), presentations thereafter that were not tested for COVID-19*

257 *(“Asymptomatic”), tested negatively (“PCR negative”) and tested positive (“PCR positive”). For*

258 *results with normal distributions, the mean value and standard deviation (in round brackets) are*

259 *shown. For results that have skewed or heavy tailed distributions, the median value and the*

260 *interquartile range is shown [in squared brackets]. Dark grey marked figures indicate a clinically*

261 *relevant difference from the Pre-COVID-19 category (based on the total allowable error (Riçós et al.,*

262 *1999)).*

263

264 Descriptive statistics of ED presentations are shown in **Table 1**. Presentations were stratified into four

265 categories: “Pre-COVID-19” consists of all ED presentations before the first case of COVID-19 in our

266 center (N = 5890). This period also includes a winter flu-season. The category “Asymptomatic”

267 consists of ED presentations (N = 3303) after the first case of COVID-19, but who were not subjected

268 to PCR testing. Finally, presentations tested for SARS-CoV-2 were categorized depending on the

269 result as “PCR negative” (N= 945) or “PCR positive” (N= 279). In the latter category, 91% (95% CI:

270 88 to 94%) of the cases were tested positive in their first PCR. The remaining 24 patients were

271 positive in their second (N = 18), third (N = 5) or fourth (N = 1) PCR.

272 **Table 1** shows the mean/median concentrations of the ED laboratory tests for each category.

273 Concentrations that clinically differed from the Pre-COVID-19 category are marked in grey. As

274 expected, patients tested positive for SARS-CoV-2 showed multiple clinically relevant differences.

275 Interestingly, some differences (like increased CRP and gGT) were – although to a lesser extent – also

276 present in the COVID-19 negative-tested patient group.

277

### 278 *CoLab-score*

279 The model obtained through adaptive lasso regression contained eleven variables, which are depicted

280 with their regression coefficients (weights) in **Table 2**. A larger  $\beta$ -coefficient does not imply that a

281 variable is more important in predicting the odds of testing positive for SARS-CoV-2, since the

282 coefficients are unscaled after model fitting and variables are on different scales. Therefore, the

283 relative importance is calculated based on scaled coefficients. The absolute basophil count has the

284 highest relative weight, followed by eosinophil count.

285

| Variable                                      | $\beta$  | Exclusion limit            | Relative importance |
|-----------------------------------------------|----------|----------------------------|---------------------|
| Intercept                                     | -6.885   |                            | -                   |
| Erythrocytes /pL                              | 0.9379   | Erythrocytes < 2.9 /pL     | 52 %                |
| Leukocytes /nL                                | -0.1298  |                            | 46 %                |
| Eosinophils /nL                               | -6.834   |                            | 86 %                |
| Basophils /nL                                 | -47.70   | Basophils >0.33 /nL        | 100 %               |
| log <sub>10</sub> of Bilirubin in $\mu$ mol/L | -1.142   | Bilirubin >169 $\mu$ mol/L | 26 %                |
| log <sub>10</sub> of LD in U/L                | 5.369    | LD >1564 U/L               | 58 %                |
| log <sub>10</sub> of AF in IU/L               | -3.114   | AF >1000 IU/L              | 45 %                |
| log <sub>10</sub> of gGT in U/L               | 0.3605   | gGT >1611 U/L              | 11 %                |
| Albumin in g/L                                | -0.1156  |                            | 45 %                |
| CRP in mg/L                                   | 0.002560 |                            | 15 %                |
| Age in years                                  | 0.002275 |                            | 4 %                 |

286

### 287 **Table 2: Calculation of the CoLab-linear predictor (LP).**

288 *The CoLab-linear predictor (LP) is calculated by summing the intercept and the products of the 11*

289 *variables with their corresponding coefficients ( $\beta$ 's).  $CoLab-LP = -6.885 + [erythrocytes] \times 0.9379$*

290  *$- [leukocytes] \times 0.1298 - [eosinophils] \times 6.834 - [basophils] \times 47.7 - \log_{10}([bilirubin]) \times 1.142 +$*



291  $\log_{10}([LD]) \times 5.369 - \log_{10}([AF]) \times 3.114 + \log_{10}([GGT]) \times 0.5005 - [albumin] \times 0.1156 + [CRP]$   
292  $\times 0.02560 + [age] \times 0.002275$ . The LP can be converted into a CoLab-score (see Figure 2) or into a  
293 probability if the prevalence is known or estimated (see details in Appendix A). The CoLab-score is  
294 not valid if any of the variables exceed the limits in the third column.

295

296 **Figure 2: Probability density plot of the CoLab-linear predictor.**

297 The probability density plots for COVID (dark grey) and non-COVID patients (light grey) are plotted  
298 against the linear predictor (see table 2). The CoLab-score cut-offs (-5.83, -4.02, -3.29, -2.34 and  
299 -1.64) are depicted with vertical dashed lines. The white-boxed numbers (between the cut-offs)  
300 represent the corresponding CoLab-score. Note that while the area under both curves is identical  
301 (since these are probability density functions), in absolute numbers the “negative or untested”-group  
302 is about 36 times larger than the PCR positive group.

303

304 As shown in **Figure 2**, the linear predictor clearly discriminates between COVID-19 and non-COVID-  
305 19. Note that in this figure, the area under both curves is equal since these are probability density  
306 functions, in reality the weekly COVID-19 prevalence at the ED varies from <1% to 36% and hence  
307 the number of presentations in the PCR positive group. Therefore, the linear predictor was converted  
308 to CoLab-scores 0 – 5 (**Figure 2**). Subsequently, the actual prevalence of the previous week was used  
309 to obtain a threshold above which patients should be tested, this is hereafter referred to as the  
310 “prevalence-dependent binary classification”. CoLab-scores above the prevalence-dependent cut-off  
311 value, are classified as “positive” and warrant PCR testing, while CoLab-scores equal to or below the  
312 cut-off value (= “negative”) discourage PCR testing. If the prevalence is not known, the CoLab-score  
313 can be used as-is, where patients with a CoLab-score of 0 can be considered non-COVID-19 and  
314 patients with a score 5 as highly suspicious for COVID-19.

315

316 *Internal validation*

317 The model was validated on the period starting from the first COVID-19 infection to July 2020, in this  
 318 period the mean prevalence was 7.2%. The AUC of the CoLab-score is 0.930 (95% CI: 0.909 to  
 319 0.945). A CoLab-score of 0 has a negative predictive value (NPV) of 0.997 (95% CI: 0.994 to 0.999,  
 320 **Table 3**), one third (38.4%, 95% CI: 26.4 to 48.4%) of all ED presentations were assigned this score  
 321 and can therefore be safely excluded. Conversely, 6.2% (95% CI: 6.3 to 7.2%) of the ED patients have  
 322 a CoLab-score 5. Given the high positive predictive value (PPV) of this category (0.682, 95% CI:  
 323 0.622 to 0.740), subsequent PCR testing is advised.

324

| CoLab Cut-off | Sensitivity           | Specificity           | PPV                    | NPV                   | %                  |
|---------------|-----------------------|-----------------------|------------------------|-----------------------|--------------------|
| 0             | 0.984 (0.970 - 0.991) | 0.411 (0.285 - 0.520) | 0.115 (0.0932 - 0.141) | 0.997 (0.994 - 0.999) | 38.4 (26.4 - 48.4) |
| ≤ 1           | 0.909 (0.886 - 0.943) | 0.793 (0.744 - 0.826) | 0.255 (0.207 - 0.299)  | 0.991 (0.989 - 0.995) | 74.4 (69.4 - 77.4) |
| ≤ 2           | 0.859 (0.811 - 0.889) | 0.887 (0.866 - 0.901) | 0.371 (0.317 - 0.414)  | 0.988 (0.983 - 0.991) | 83.2 (82.2 - 85.2) |
| ≤ 3           | 0.750 (0.700 - 0.810) | 0.953 (0.944 - 0.959) | 0.551 (0.494 - 0.601)  | 0.980 (0.975 - 0.985) | 90.1 (89.1 - 91.1) |
| ≤ 4           | 0.608 (0.522 - 0.685) | 0.978 (0.973 - 0.983) | 0.682 (0.622 - 0.740)  | 0.970 (0.962 - 0.977) | 93.8 (92.8 - 93.8) |
| Pos/Neg       | 0.923 (0.879 - 0.944) | 0.816 (0.756 - 0.842) | 0.310 (0.246 - 0.352)  | 0.992 (0.987 - 0.994) | -                  |

325

326 **Table 3: Diagnostic performance CoLab-score in the development dataset.**

327 *The development dataset was internally validation for the period March 2020 – July 2020 (N =*  
 328 *4.527). Sensitivities, specificities, positive predictive values (PPV), negative predictive values (NPV)*  
 329 *and fraction of patients (%) are shown for fixed cut-offs (CoLab-score 0 till ≤ 4) and the prevalence*  
 330 *dependent binary CoLab-classification (Pos/Neg). The numbers in round brackets represent the 95%*  
 331 *confidence intervals. The first column defines the threshold above which CoLab-score a patient is*  
 332 *considered positive.*

333

334 For CoLab-scores 1 - 4, the threshold to guide PCR testing is dependent on COVID-19 prevalence.  
 335 Therefore, the CoLab-score was dichotomized as positive or negative, based on the prevalence of the  
 336 previous week. As shown in **Table 3**, the sensitivity of this binary CoLab-classification (0.923, 95%  
 337 CI: 0.879 to 0.944) is similar to singular PCR testing (0.91, 95% CI: 0.88 to 0.94), and has a NPV of

338 0.992 (95% CI: 0.987 to 0.994). Therefore, the CoLab-score and the prevalence dependent binary  
339 classification could be used to guide PCR testing when rapid PCR testing is not available or test  
340 capacity is limited. Using the CoLab-score retrospectively on the development dataset to guide PCR  
341 testing, 92.3% (95% CI: 87.9 to 94.4%) of the COVID-19 patients could have been identified with  
342 30.5% (95% CI: 14.5% to 37.6%) fewer PCR test. The largest reductions are seen in periods with low  
343 or rapidly decreasing prevalence, when more than half of the PCR tests may be superfluous (**Figure**  
344 **3**).

345

### 346 **Figure 3: CoLab-guided PCR testing versus routine practice.**

347 *The black bars represent the number of SARS-CoV-2-PCR tests performed on a weekly basis in the*  
348 *Catharina Hospital. The grey bars represent the number of positives by using the prevalence*  
349 *dependent binary CoLab-classification (in this setting the COVID-19 ED prevalence of the previous*  
350 *week determines the threshold above which a CoLab-score is considered positive in the week*  
351 *thereafter). If PCR testing was performed for all CoLab-positives, the sensitivity would not be lower*  
352 *than a single PCR-test (see **Table 3**) and this would result a reduction in the number of PCR tests.*

353

### 354 *Temporal validation*

355 As the CoLab-score was developed in our center after the first COVID-19-wave in the Netherlands,  
356 the performance was evaluated in our center during the subsequent second wave. In the Netherlands,  
357 the second wave started in August 2020. During this period lab results from 5100 ED presentations  
358 were collected. After applying the inclusion flow as shown in **Figure 1B**, 4.333 presentations  
359 remained, of which 165 were associated with a COVID-19 infection.

360 The mean prevalence in this period was 3.8%, which is approximately half of the prevalence during  
361 the first period. The AUC of the CoLab-score in the temporal validation set is 0.895 (95% CI: 0.866 to  
362 0.932). The performance in terms of specificity and NPV is similar to the development cohort,  
363 whereas the sensitivity and PPV are slightly lower, although 95% CIs overlap (see **Tables 3 and 4**). In

364 terms of calibration, the observed fraction of COVID-19 positives appears slightly higher than  
365 expected (**Figure 6A**). When using the prevalence-dependent binary classification, the sensitivity is  
366 0.868 and the NPV is 0.993 (**Table 4**), which is somewhat lower than the development dataset.  
367 Based on these findings, we investigated the relation between the CoLab-linear predictor and duration  
368 of COVID-19-related symptoms at ED presentation in the "PCR positive" presentations of both the  
369 internal and temporal validation datasets. As shown in **Figure 4**, the CoLab-linear predictor increases  
370 with the duration of symptoms and gradually decreases after day 7. As a consequence, some COVID-  
371 19 patients with early or late presentation after onset of symptoms are missed by the CoLab-score.  
372 Optimal performance of the CoLab-score is achieved when the onset of symptoms is  $> 1$  and  $< 10$   
373 days prior to ED presentation.

374

375 **Figure 4: Association between the CoLab-linear predictor and the duration of COVID-19-**  
376 **related symptoms.**

377 *For all PCR-positive ED presentations in the development and temporal validation dataset, the*  
378 *CoLab-linear predict is plotted against the duration of COVID-related symptoms as registered in the*  
379 *electronic patient records. Patients with unknown duration are not plotted. Patients without symptoms*  
380 *were plotted at 0 days. The solid horizontal lines represent the CoLab-score thresholds, the dashed*  
381 *line is a LOESS regression curve with 95% CI. As the duration of symptoms is an integer, some*  
382 *random jitter was added to the days, for visualization purposes. Note that only the first 14 days are*  
383 *shown in this graph.*

384

385 **External validation**

386 For external validation, data obtained from three other centers were used. The data were processed  
387 analogous to the development dataset. The inclusion flow is summarized in **Figure 5**.

388

389 **Figure 5: Inclusion flow of ED patients in three external centers.**

390 *All emergency department (ED) presentations with routine venous blood sampling were included.*  
391 *Missingness of lab panels was assessed for the 11 variables in the CoLab-score (see Table 2). Re-*  
392 *presentations after a positive PCR result or clinical COVID-19 registration were excluded as*  
393 *“previous COVID-19+”. Presentations with any laboratory result above the limits of the CoLab-score*  
394 *(see Table 2) were excluded.*

395

396 The large number of patients that are excluded in the first step (incomplete laboratory panel) in center  
397 1 and center 2 is due to the fact that only ED presentations for internal medicine were tested for all 10  
398 laboratory tests of the CoLab-score. The ED lab panel of other disciplines (e.g. urology, surgery or  
399 pediatrics) differed and did not contain the required tests. Nevertheless, the majority of COVID-19 ED  
400 presentations were examined by clinicians of internal medicine, which is reflected by the low number  
401 of PCR-positive patients excluded. Other causes of missing lab results were mainly due to assay  
402 interference. COVID-19 prevalence differed between the three centers (4.0%, 3.4% and 9.5%  
403 respectively) and was lower in centers 1 and 2, and higher in center 3 than the internal validation  
404 prevalence. The AUC’s of the CoLab-score are 0.904 (95% CI: 0.866 to 0.942), 0.886 (95% CI: 0.851  
405 - 0.922) and 0.891 (95% CI: 0.872 - 0.909), for centers 1, 2, and 3 respectively.

406 Performance in terms of sensitivity and specificity is shown in **Table 4**. Also the PPVs and NPVs are  
407 shown, although these are largely dependent on prevalence. Although the sensitivity of the prevalence  
408 dependent binary CoLab-classification in some centers is somewhat lower than in the development  
409 and temporal dataset, the sensitivity of CoLab-score 0 in all centers is  $\geq 0.96$ . Therefore, the NPV of  
410 CoLab-score 0 was more than 99%. However, when only presentations were taken into account with  
411 duration of symptoms  $>1$  and  $< 10$  days prior to presentation, the NPV for all patients with CoLab-  
412 score 0 was  $>99.8\%$  (**Table 4**).

413 Calibration plots for external <sup>It is made available under a [CC-BY 4.0 International license](#)</sup> centers are shown in **Figure 6B-D**, the observed fraction of COVID-19  
 414 positives is slightly lower than expected in centers 1 and 2. For center 3, low probabilities appear  
 415 slightly underestimated and high probabilities slightly overestimated.

416

| CoLab Score | Validation set | Sens. | Spec. | PPV   | NPV   | TP  | TN    | FP   | FN     | %  |
|-------------|----------------|-------|-------|-------|-------|-----|-------|------|--------|----|
| 0           | Temporal       | 0.958 | 0.410 | 0.060 | 0.996 | 158 | 1708  | 2460 | 7 (2)  | 40 |
|             | Center 1       | 1.000 | 0.333 | 0.059 | 1.000 | 52  | 410   | 822  | 0 (0)  | 32 |
|             | Center 2       | 0.960 | 0.352 | 0.050 | 0.996 | 95  | 985   | 1815 | 4 (2)  | 34 |
|             | Center 3       | 0.973 | 0.322 | 0.131 | 0.991 | 327 | 1034  | 2175 | 9 (5)  | 29 |
|             | Combined       | 0.969 | 0.363 | 0.080 | 0.995 | 632 | 4137  | 7272 | 20 (9) | 34 |
| ≤1          | Temporal       | 0.867 | 0.777 | 0.133 | 0.993 | 143 | 3239  | 929  | 22     | 75 |
|             | Center 1       | 0.923 | 0.696 | 0.113 | 0.995 | 48  | 857   | 375  | 4      | 67 |
|             | Center 2       | 0.929 | 0.680 | 0.093 | 0.996 | 92  | 1905  | 895  | 7      | 66 |
|             | Center 3       | 0.917 | 0.675 | 0.228 | 0.987 | 308 | 2167  | 1042 | 28     | 62 |
|             | Combined       | 0.906 | 0.716 | 0.154 | 0.993 | 591 | 8168  | 3241 | 61     | 68 |
| ≤2          | Temporal       | 0.776 | 0.885 | 0.211 | 0.990 | 128 | 3688  | 480  | 37     | 86 |
|             | Center 1       | 0.808 | 0.812 | 0.154 | 0.990 | 42  | 1001  | 231  | 10     | 79 |
|             | Center 2       | 0.869 | 0.802 | 0.134 | 0.994 | 86  | 2246  | 554  | 13     | 78 |
|             | Center 3       | 0.893 | 0.795 | 0.313 | 0.986 | 300 | 2552  | 657  | 36     | 73 |
|             | Combined       | 0.853 | 0.832 | 0.224 | 0.990 | 556 | 9487  | 1922 | 96     | 79 |
| ≤3          | Temporal       | 0.648 | 0.956 | 0.368 | 0.986 | 107 | 3984  | 184  | 58     | 93 |
|             | Center 1       | 0.750 | 0.910 | 0.260 | 0.989 | 39  | 1121  | 111  | 13     | 88 |
|             | Center 2       | 0.687 | 0.899 | 0.193 | 0.988 | 68  | 2516  | 284  | 31     | 88 |
|             | Center 3       | 0.768 | 0.888 | 0.417 | 0.973 | 258 | 2848  | 361  | 78     | 83 |
|             | Combined       | 0.724 | 0.918 | 0.334 | 0.983 | 472 | 10469 | 940  | 180    | 88 |
| ≤4          | Temporal       | 0.509 | 0.981 | 0.519 | 0.981 | 84  | 4090  | 78   | 81     | 96 |
|             | Center 1       | 0.654 | 0.952 | 0.366 | 0.985 | 34  | 1173  | 59   | 18     | 93 |
|             | Center 2       | 0.556 | 0.953 | 0.294 | 0.984 | 55  | 2668  | 132  | 44     | 94 |
|             | Center 3       | 0.667 | 0.931 | 0.502 | 0.964 | 224 | 2987  | 222  | 112    | 87 |
|             | Combined       | 0.609 | 0.957 | 0.447 | 0.977 | 397 | 10918 | 491  | 255    | 93 |
| Pos / Neg   | Temporal       | 0.865 | 0.867 | 0.217 | 0.993 | 135 | 3189  | 488  | 21     | -  |
|             | Center 1       | 0.941 | 0.824 | 0.191 | 0.997 | 48  | 948   | 203  | 3      | -  |
|             | Center 2       | 0.857 | 0.861 | 0.193 | 0.994 | 84  | 2179  | 351  | 14     | -  |
|             | Center 3       | 0.899 | 0.571 | 0.230 | 0.976 | 295 | 1314  | 988  | 33     | -  |
|             | Combined       | 0.883 | 0.801 | 0.216 | 0.991 | 567 | 8277  | 2054 | 75     | -  |

417

418 **Table 4: Diagnostic performance of the CoLab-score in the validation dataset (temporal) and**  
 419 **three external hospitals.**  
 420 *Sensitivities (sens.), specificities (spec.), positive predicting values (PPV), negative predicting values*  
 421 *(NPV), true positives (TP), true negatives (TN), false positives (FP) and false negatives (FN) are shown*  
 422 *for fixed cut-offs (CoLab-score 0 till ≤ 4) and the prevalence dependent binary CoLab-classification*  
 423 *(Pos/Neg). In the last column the fraction of patients at or below the cut-off are shown. For CoLab-*

424 score 0, the numbers with round brackets indicate the number of false negatives when only patients with  
425 symptom duration  $>1$  and  $<10$  days are taken into account. Note that “0” lists the sensitivity and NPV  
426 of CoLab-score 0 and “ $\leq 4$ ” lists the specificity and PPV of CoLab-score 5.

427

428 **Figure 6: CoLab-score calibration plots of the temporal validation (A), external validation center**  
429 **1 (B), external validation center 2 (C) and external validation center 3 (D).**

430 *In the calibration plots, the proportion of observed COVID-19 positives versus expected probabilities*  
431 *are plotted. Observations are grouped with an average of 150 observations per group. The expected*  
432 *probabilities follow from applying the inverse logit function to the CoLab-linear predictor calculated*  
433 *from **Table 2**. If the observed proportion in an external dataset is lower than the expected proportion,*  
434 *this means risks are over-estimated, if the observed fraction is higher, risks are under-estimated. Ideally,*  
435 *observed proportions are equal to expected proportions, this ideal-calibration-line is shown as a*  
436 *straight line through the origin with a slope of 1. The logistic calibration line is a logistic regression fit*  
437 *of the predicted probabilities. [Intercept, slope] for plots A-D: A [0.22, 0.92], B [-0.39, 0.92], C [-0.76,*  
438 *0.77], D [0.08, 0.79]. Although no validation datasets show perfect calibration, this is the result of*  
439 *differences in COVID-19 prevalence in each center and differences in calibration of laboratory*  
440 *equipment (see **Supplemental Figure 6**).*

441

442 **Supplemental Figure 6: Probability density plots of laboratory parameters.**

443 *Probability density plots are shown for all control patients of the development dataset and the three*  
444 *external centers. Ideally all distributions should overlap since this implies that control patient*  
445 *populations are most likely similar in the development dataset to the external datasets.*

446

447

## 448 **Discussion**

449 Given the impact of COVID-19 on society and healthcare, there is a need for simple and fast detection  
450 of patients with a possible COVID-19 infection in the ED. The CoLab-score described in this study, is  
451 a fast and accurate risk score to triage patients presenting at the ED based on routine blood  
452 biomarkers. The prevalence-dependent binary CoLab-classification preserves a balance between PCR  
453 testing - and not testing, even in situations of changing prevalence. In one third of the ED  
454 presentations, PCR testing could be safely omitted with a negative predictive value of 0.995. At low or  
455 rapidly decreasing prevalence, the CoLab-classification could save more than half of the PCR tests.

456 The main strength of this study is that the CoLab-score can be used as a means of early-warning or  
457 triaging tool for the entire ED population, regardless of presenting symptoms. This is in contrast to the  
458 vast majority of COVID-19 diagnostic models that have been developed on a sub-population of PCR-  
459 tested patients (Brinati et al., 2020; Fink et al., 2020; Giamello et al., 2020; Joshi et al., 2020;  
460 Kurstjens et al., 2020; Plante et al., 2020; Qin et al., 2020; Tordjman et al., 2020). Moreover, the  
461 CoLab-score requires only routine blood tests instead of (features from) imaging such as CT-scans or  
462 one or more laboratory test results that are not routinely measured in the ED such as interleukin-6 or 3-  
463 hydroxybuteric acid (Wynants et al., 2020). Although this is a retrospective case-control study, there is  
464 some unavoidable missing data. In our cohort 13 – 18% of the ED presentations could not be used due  
465 to one or more missing laboratory results. This is similar to other studies; 22% (Kurstjens et al., 2020),  
466 17% (Joshi et al., 2020) and 11% (Tordjman et al., 2020). We do not expect that presentations with  
467 missing data lead to a severe inclusion bias, but important to note is that the full lab panel was not  
468 always requested for pediatric, obstetric and surgery patients. Ideally, probabilities predicted by a  
469 model should be well calibrated (Van Calster et al., 2019). However, when the prevalence changes  
470 over time, the mean prevalence may not reflect the current prevalence of a center at any given time  
471 and calibration is never guaranteed. We chose to categorize the linear predictor into discrete  
472 prevalence-based scoring categories. A downside of the CoLab prevalence-dependent binary  
473 classification is that false negative results may occur, this is mostly the case when the prevalence  
474 increases rapidly. As the threshold depends on the prevalence of the previous week, the threshold is



475 lagging behind the actual prevalence. Estimating the prevalence more frequently during rapidly  
476 changing prevalence alleviates this problem but may be more time consuming and prone to stochastic  
477 variation. Nevertheless, when absolute certainty to rule-out COVID-19 is required, a CoLab-score of 0  
478 can still be used, unless the prevalence is greater than 40%. In this study we did not investigate  
479 whether the CoLab-score might be increased by other virus infections, but in an historic patient cohort  
480 we did not find discriminative ability in separating between influenza-PCR-negative and PCR-positive  
481 patients (data not shown).

482 One study that was comparable to our study was published by Plante et. al. (Plante et al., 2020). Their  
483 study is similar in terms of outcome and used pre-pandemic patients as controls and PCR positive  
484 patients as cases. Also the input variables consisted solely of 15 routinely laboratory tests [4].  
485 Interestingly, their machine learning approach also identified eosinophils, leukocytes, basophils,  
486 erythrocytes, albumin and bilirubin as important features. However, one of the other contributing  
487 features was bicarbonate, which is generally only requested for a subgroup of ED patients requiring  
488 arterial blood gas analysis. This could explain the 63.6% drop outs due to missing data. Furthermore,  
489 their model is not easily implemented in current hospital IT systems.

490 Currently, five hospitals in the Netherlands have already implemented the CoLab-score in daily patient  
491 care in the ED, three other centers are in the process of implementation. Main reasons to adopt the  
492 CoLab-score, were scarcity in PCR-reagents and long turnaround times of PCR results by centralized  
493 PCR-facilities. This underlines the strengths of CoLab-score, i.e. it safely rules out COVID-19 for one  
494 third of the ED patients and is instantly reported once the underlying laboratory results are available,  
495 usually within one hour.

496 As we have developed a powerful tool to triage patients at the ED, future research is needed to  
497 determine if the CoLab-score also identifies COVID-19 patients with new SARS-CoV-2 mutations.  
498 However, since the CoLab-score reflects the biochemical consequences of the virus and not the virus  
499 itself, we expect that the CoLab-score is also sensitive for future mutations of SARS-CoV-2.

500 **Funding**

501 This study was undertaken without any external funding.

502 **Acknowledgements**

503 Not applicable.

## 504 **References**

505

506 Albahri AS, Hamid RA, Alwan J k., Al-qays ZT, Zaidan AA, Zaidan BB, Albahri AOS, AlAmoodi AH,  
507 Khlaf JM, Almahdi EM, Thabet E, Hadi SM, Mohammed KI, Alsalem MA, Al-Obaidi JR,  
508 Madhloom HT. 2020. Role of biological Data Mining and Machine Learning Techniques in  
509 Detecting and Diagnosing the Novel Coronavirus (COVID-19): A Systematic Review. *J Med Syst.*  
510 doi:10.1007/s10916-020-01582-x

511 Brinati D, Campagner A, Ferrari D, Locatelli M, Banfi G, Cabitza F. 2020. Detection of COVID-19  
512 Infection from Routine Blood Exams with Machine Learning: A Feasibility Study. *J Med Syst*  
513 **44**:1–12. doi:10.1007/s10916-020-01597-4

514 Coronavirus Disease (COVID-19) Situation Reports. n.d.  
515 <https://www.who.int/emergencies/diseases/novel-coronavirus-2019/situation-reports/>

516 Efron B. 1983. Estimating the error rate of a prediction rule: Improvement on cross-validation. *J Am*  
517 *Stat Assoc* **78**:316–331. doi:10.1080/01621459.1983.10477973

518 Fink DL, Khan PY, Goldman N, Cai J, Hone L, Mooney C, El-Shakankery KH, Sismey G, Whitford V,  
519 Marks M, Thomas S. 2020. Development and internal validation of a diagnostic prediction model  
520 for COVID-19 at time of admission to hospital. *QJM An Int J Med.* doi:10.1093/qjmed/hcaa305

521 Friedman J, Hastie T, Tibshirani R. 2010. Regularization paths for generalized linear models via  
522 coordinate descent. *J Stat Softw* **33**:1–22. doi:10.18637/jss.v033.i01

523 Giamello JD, Paglietta G, Cavalot G, Allione A, Abram S, Dutto L, Bernardi S, Bernardi E, Tosello F,  
524 Lauria G. 2020. A simple tool to help ruling-out Covid-19 in the emergency department: derivation  
525 and validation of the LDH-CRP-Lymphocyte (LCL) score. *Emerg Care J* **16**.  
526 doi:10.4081/ecj.2020.9336

527 Harrell Jr FE. 2021. rms: Regression Modeling Strategies.

528 Hooli S, King C. 2020. Generalizability of Coronavirus Disease 2019 (COVID-19) Clinical Prediction

- 529 Models. *Clin Infect Dis* **71**:897–897. doi:10.1093/cid/ciaa417
- 530 Joshi RP, Pejaver V, Hammarlund NE, Sung H, Lee SK, Furmanchuk A, Lee HY, Scott G, Gombar S,  
531 Shah N, Shen S, Nassiri A, Schneider D, Ahmad FS, Liebovitz D, Kho A, Mooney S, Pinsky BA,  
532 Banaei N. 2020. A predictive tool for identification of SARS-CoV-2 PCR-negative emergency  
533 department patients using routine test results. *J Clin Virol* **129**:104502.  
534 doi:10.1016/j.jcv.2020.104502
- 535 King G, Zeng L. 2001. Logistic Regression in Rare Events Data. *Polit Anal* **9**:137–163.  
536 doi:10.1093/oxfordjournals.pan.a004868
- 537 Kurstjens S, van der Horst A, Herpers R, Geerits MWL, Kluiters-De Hingh YCM, Göttgens EL, Blaauw  
538 MJT, Thelen MHM, Elisen MGLM, Kusters R. 2020. Rapid identification of SARS-CoV-2-  
539 infected patients at the emergency department using routine testing. *Clin Chem Lab Med* **58**:1587–  
540 1593. doi:10.1515/cclm-2020-0593
- 541 Lessmann N, Sánchez CI, Beenen L, Boulogne LH, Brink M, Calli E, Charbonnier JP, Dofferhoff T,  
542 van Everdingen WM, Gerke PK, Geurts B, Gietema HA, Groeneveld M, van Harten L, Hendrix  
543 N, Hendrix W, Huisman HJ, Išgum I, Jacobs C, Kluge R, Kok M, Krdzalic J, Lassen-Schmidt B,  
544 van Leeuwen K, Meakin J, Overkamp M, van Rees Vellinga T, van Rikxoort EM, Samperna R,  
545 Schaefer-Prokop C, Schalekamp S, Scholten ET, Sital C, Stöger JL, Teuwen J, Venkadesh KV, de  
546 Vente C, Vermaat M, Xie W, de Wilde B, Prokop M, van Ginneken B. 2021. Automated  
547 assessment of COVID-19 reporting and data system and chest CT severity scores in patients  
548 suspected of having COVID-19 using artificial intelligence. *Radiology* **298**:E18–E28.  
549 doi:10.1148/RADIOL.2020202439
- 550 Linssen J, Ermens A, Berrevoets M, Seghezzi M, Previtali G, Brugge S van der S van der, Russcher H,  
551 Verbon A, Gillis J, Riedl J, Jongh E de, Saker J, Münster M, Munnix ICA, Dofferhoff A,  
552 Scharnhorst V, Ammerlaan H, Deiteren K, Bakker SJL, van Pelt LJ, Hingh YK De, Leers MPG,  
553 van der Ven A. 2020. A novel haemocytometric covid-19 prognostic score developed and validated  
554 in an observational multicentre european hospital-based study. *Elife* **9**:1–37.

- 555 doi:10.7554/eLife.63195
- 556 Plante TB, Blau AM, Berg AN, Weinberg AS, Jun IC, Tapson VF, Kanigan TS, Adib AB. 2020.  
557 Development and external validation of a machine learning tool to rule out COVID-19 among  
558 adults in the emergency department using routine blood tests: A large, multicenter, real-world  
559 study. *J Med Internet Res* **22**:e24048. doi:10.2196/24048
- 560 Qin L, Yang Y, Cao Q, Cheng Z, Wang X, Sun Q, Yan F, Qu J, Yang W. 2020. A predictive model and  
561 scoring system combining clinical and CT characteristics for the diagnosis of COVID-19. *Eur*  
562 *Radiol* **30**:6797–6807. doi:10.1007/s00330-020-07022-1
- 563 R Core Team. 2020. R: A Language and Environment for Statistical Computing.
- 564 Ricós C, Alvarez V, Cava F, García-Lario J V., Hernández A, Jiménez C V., Minchinela J, Perich C,  
565 Simón M. 1999. Current databases on biological variation: Pros, cons and progress. *Scand J Clin*  
566 *Lab Invest*. doi:10.1080/00365519950185229
- 567 Robin X, Turck N, Hainard A, Tiberti N, Lisacek F, Sanchez JC, Müller M. 2011. pROC: An open-  
568 source package for R and S+ to analyze and compare ROC curves. *BMC Bioinformatics* **12**:77.  
569 doi:10.1186/1471-2105-12-77
- 570 Tibshirani R. 1996. Regression Shrinkage and Selection Via the Lasso. *J R Stat Soc Ser B* **58**:267–288.  
571 doi:10.1111/j.2517-6161.1996.tb02080.x
- 572 Tordjman M, Mekki A, Mali RD, Saab I, Chassagnon G, Guillo E, Burns R, Eshagh D, Beaune S,  
573 Madelin G, Bessis S, Feydy A, Mihoubi F, Doumenc B, Mouthon L, Carlier R-Y, Drapé J-L, Revel  
574 M-P. 2020. Pre-test probability for SARS-Cov-2-related infection score: The PARIS score. *PLoS*  
575 *One* **15**:e0243342. doi:10.1371/journal.pone.0243342
- 576 Van Calster B, McLernon DJ, Van Smeden M, Wynants L, Steyerberg EW, Bossuyt P, Collins GS,  
577 MacAskill P, McLernon DJ, Moons KGM, Steyerberg EW, Van Calster B, Van Smeden M,  
578 Vickers AJ. 2019. Calibration: The Achilles heel of predictive analytics. *BMC Med* **17**:230.  
579 doi:10.1186/s12916-019-1466-7

- 580 Wang F, Hou H, Wang T, Luo Y, Fang G, Wu S, Zhou H, Sun Z. 2020. Establishing a model for  
581 predicting the outcome of COVID-19 based on combination of laboratory tests. *Travel Med Infect*  
582 *Dis* **36**:101782. doi:10.1016/j.tmaid.2020.101782
- 583 Wynants L, Van Calster B, Collins GS, Riley RD, Heinze G, Schuit E, Bonten MMJ, Damen JAA,  
584 Debray TPA, De Vos M, Dhiman P, Haller MC, Harhay MO, Henckaerts L, Kreuzberger N,  
585 Lohmann A, Luijken K, Ma J, Andaur Navarro CL, Reitsma JB, Sergeant JC, Shi C, Skoetz N,  
586 Smits LJM, Snell KIE, Sperrin M, Spijker R, Steyerberg EW, Takada T, Van Kuijk SMJ, Van  
587 Royen FS, Wallisch C, Hooft L, Moons KGM, Van Smeden M. 2020. Prediction models for  
588 diagnosis and prognosis of covid-19: Systematic review and critical appraisal. *BMJ* **369**:18.  
589 doi:10.1136/bmj.m1328
- 590 Zeng Z, Ma Y, Zeng H, Huang P, Liu W, Jiang M, Xiang X, Deng D, Liao X, Chen P, Chen Y. 2021.  
591 Simple nomogram based on initial laboratory data for predicting the probability of ICU transfer of  
592 COVID-19 patients: Multicenter retrospective study. *J Med Virol* **93**:434–440.  
593 doi:10.1002/jmv.26244
- 594 Zhou Y, He Y, Yang H, Yu H, Wang T, Chen Z, Yao R, Liang Z. 2020. Development and validation a  
595 nomogram for predicting the risk of severe COVID-19: A multi-center study in Sichuan, China.  
596 *PLoS One* **15**:e0233328. doi:10.1371/journal.pone.0233328
- 597 Zou H. 2006. The adaptive lasso and its oracle properties. *J Am Stat Assoc* **101**:1418–1429.  
598 doi:10.1198/016214506000000735
- 599

**A**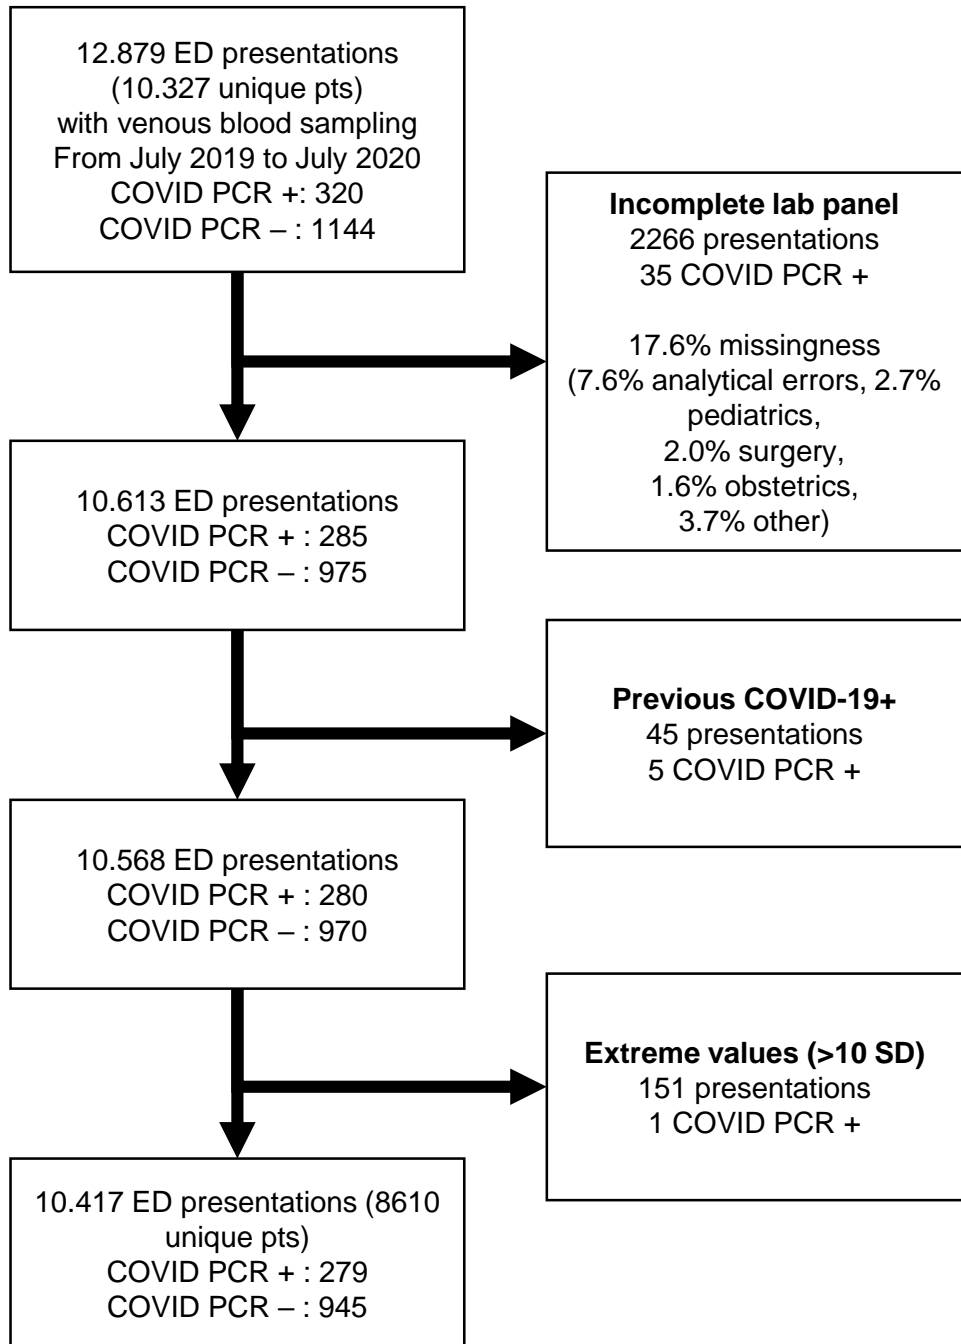**B**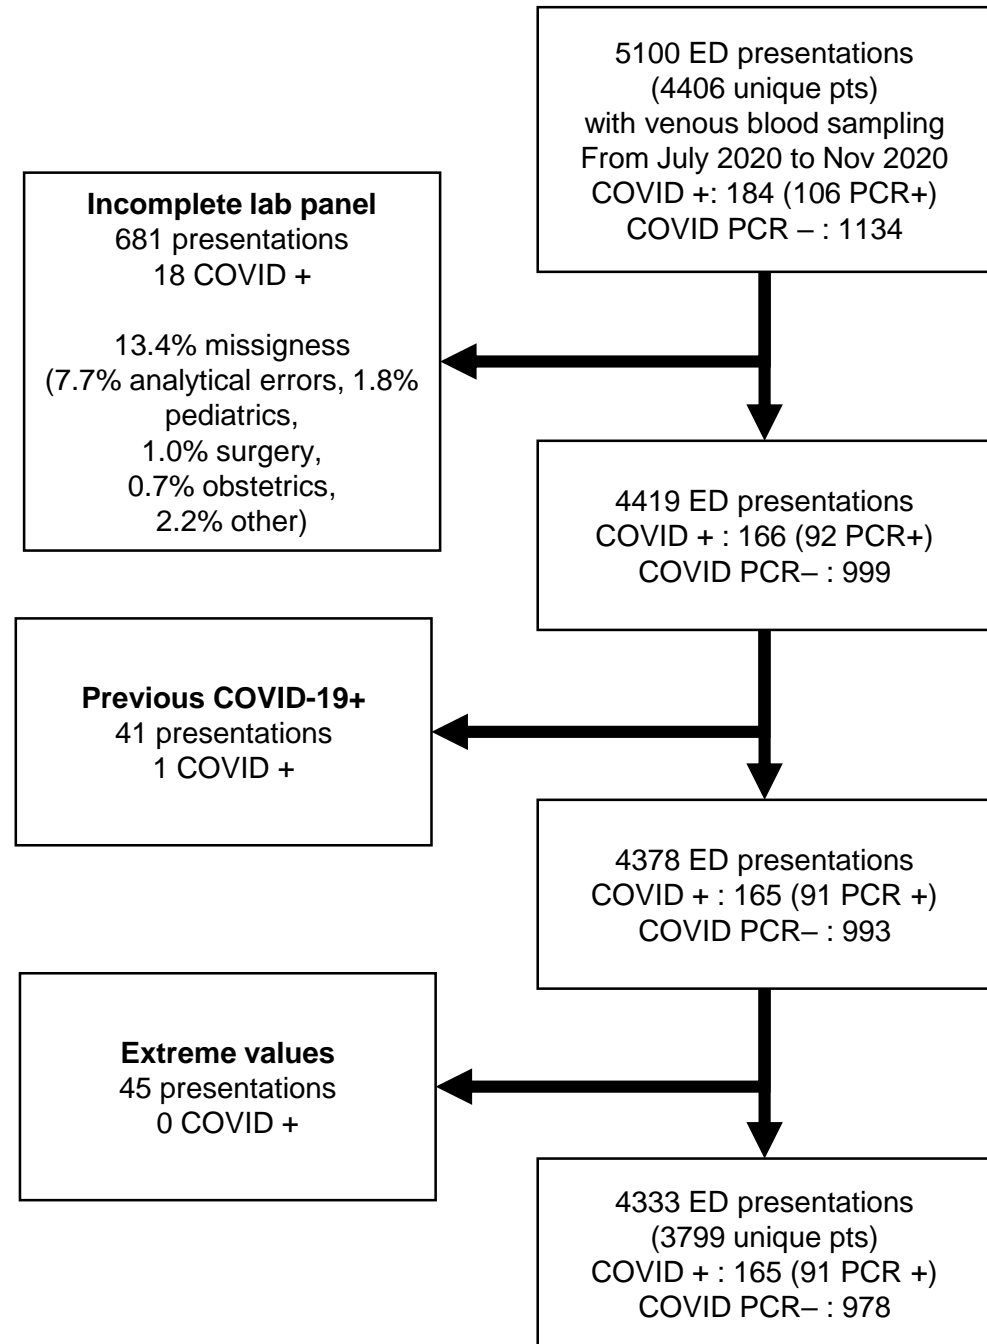

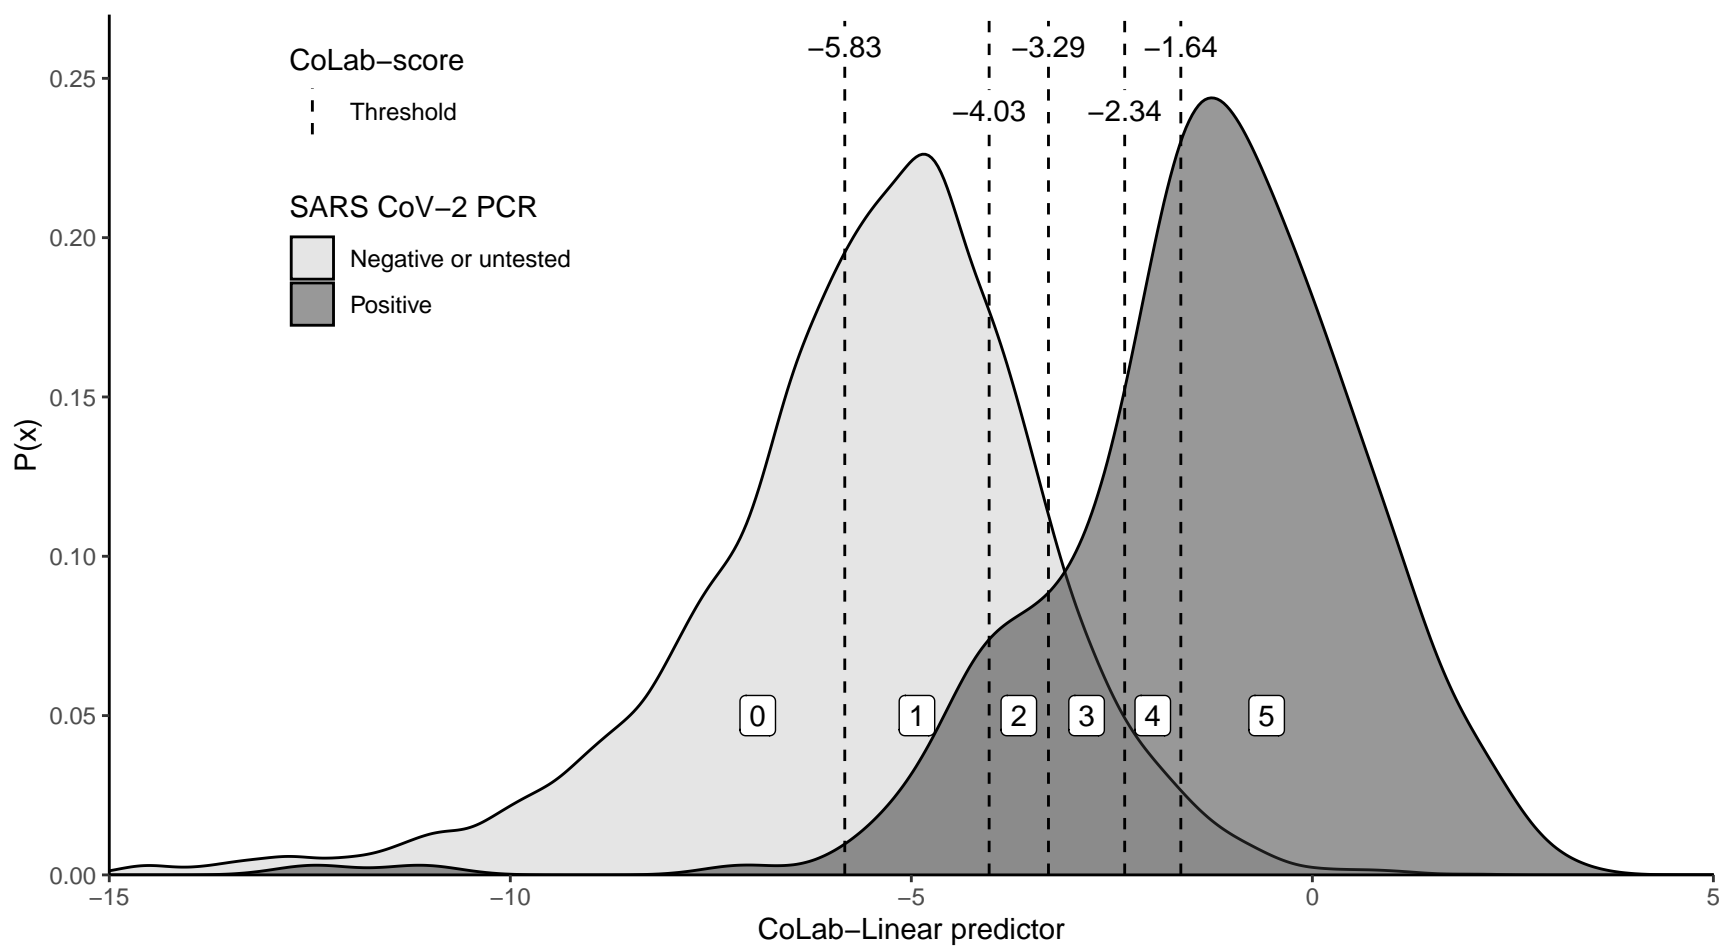



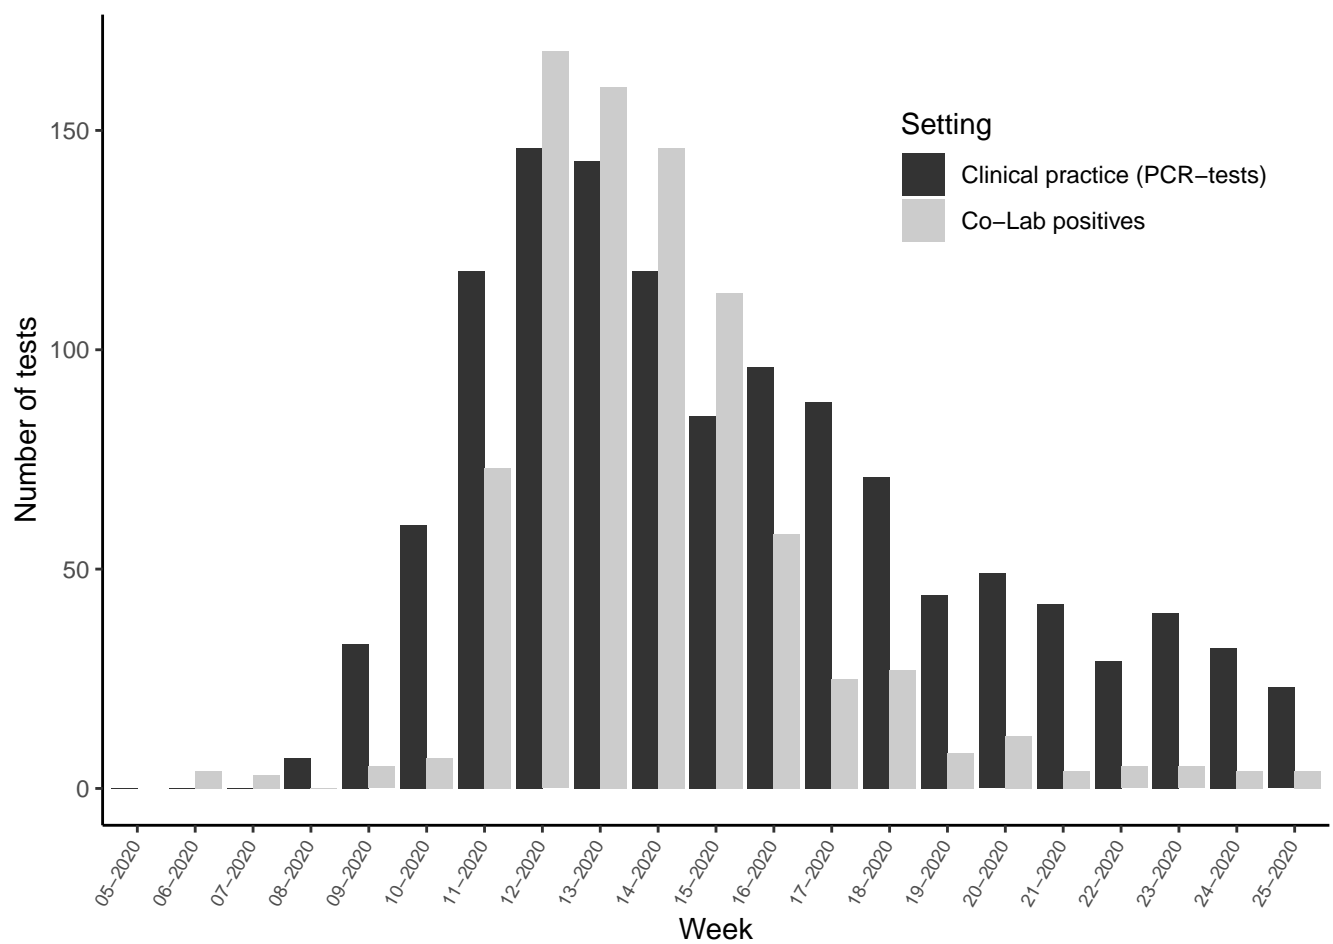

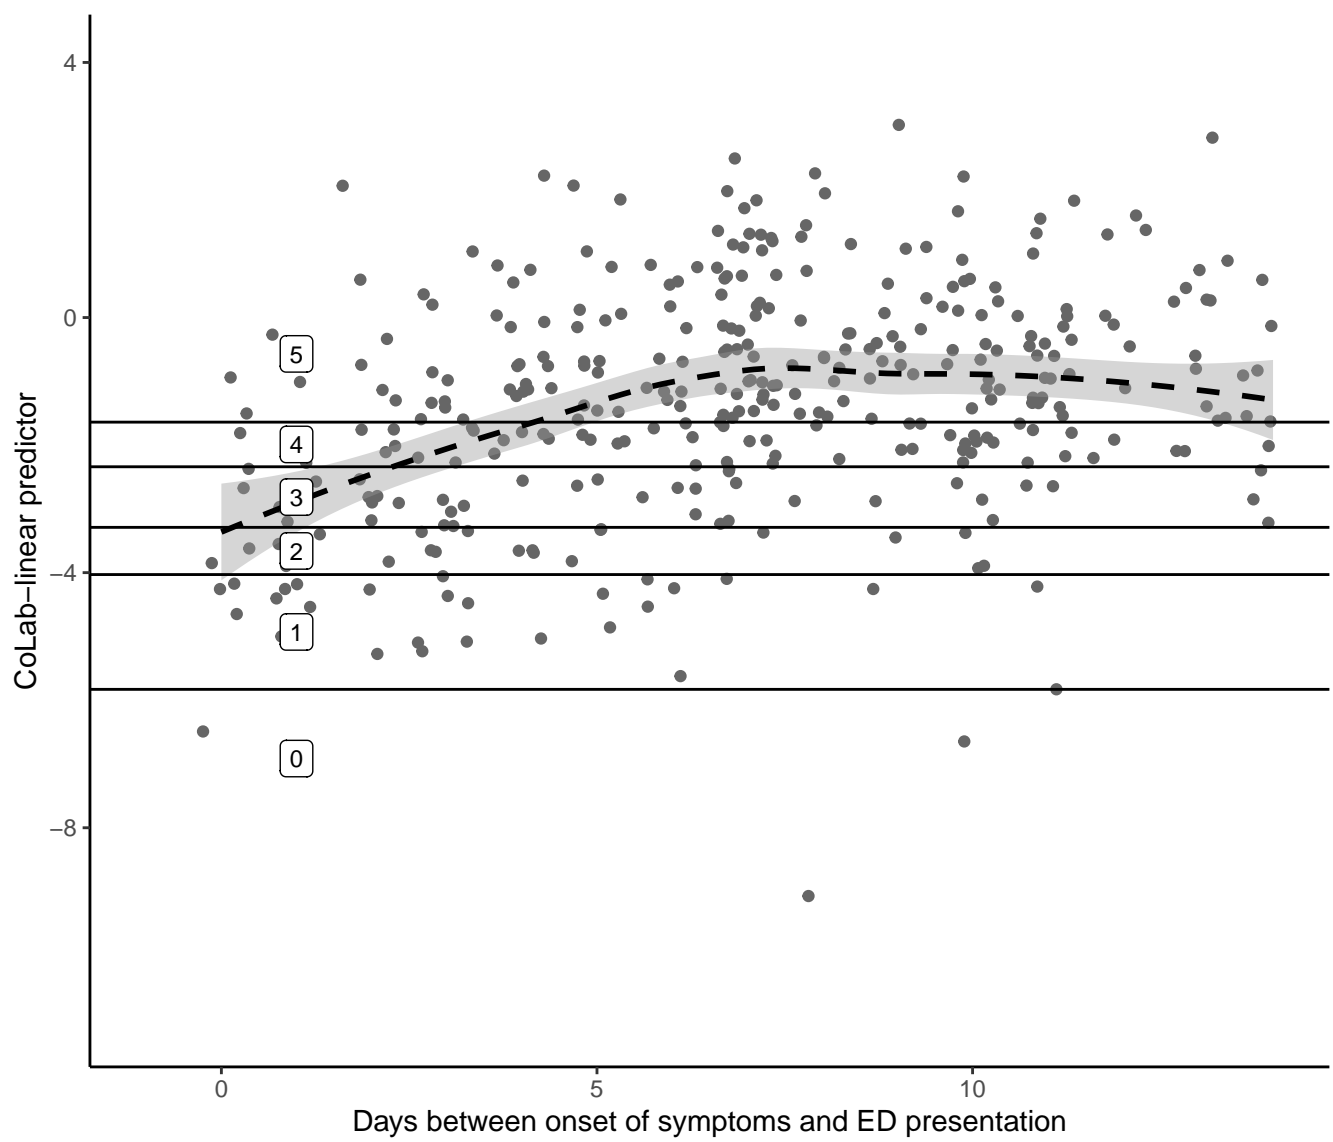

### Center 1

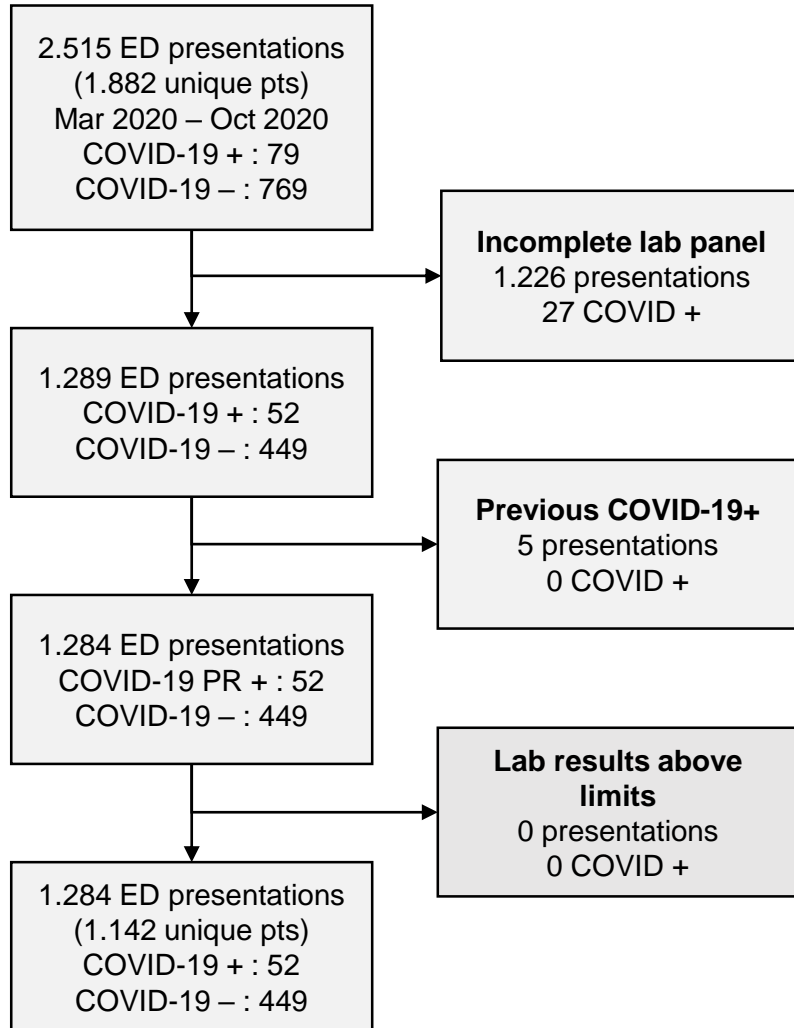

### Center 2

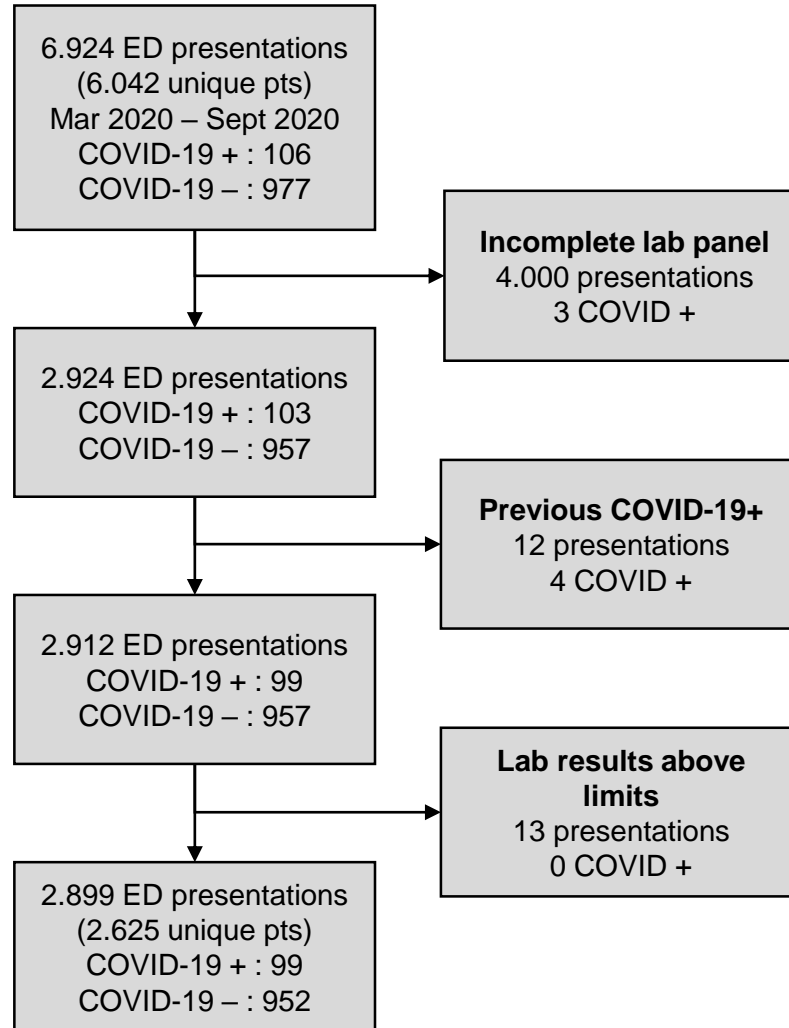

### Center 3

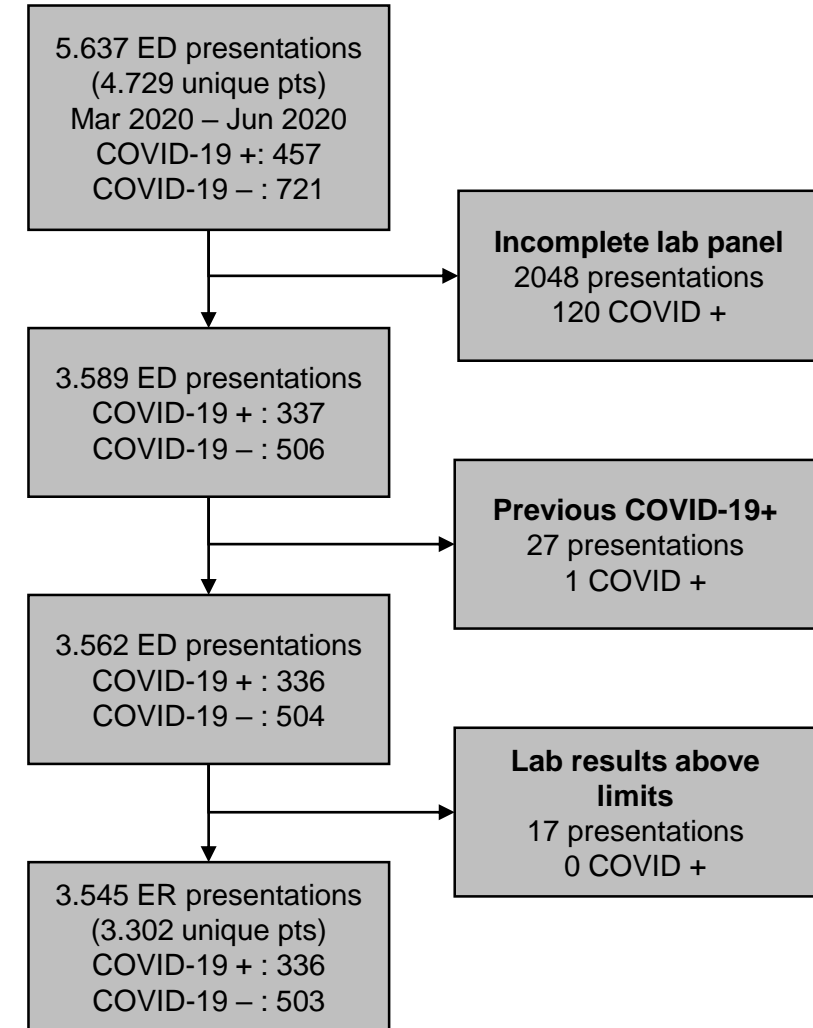

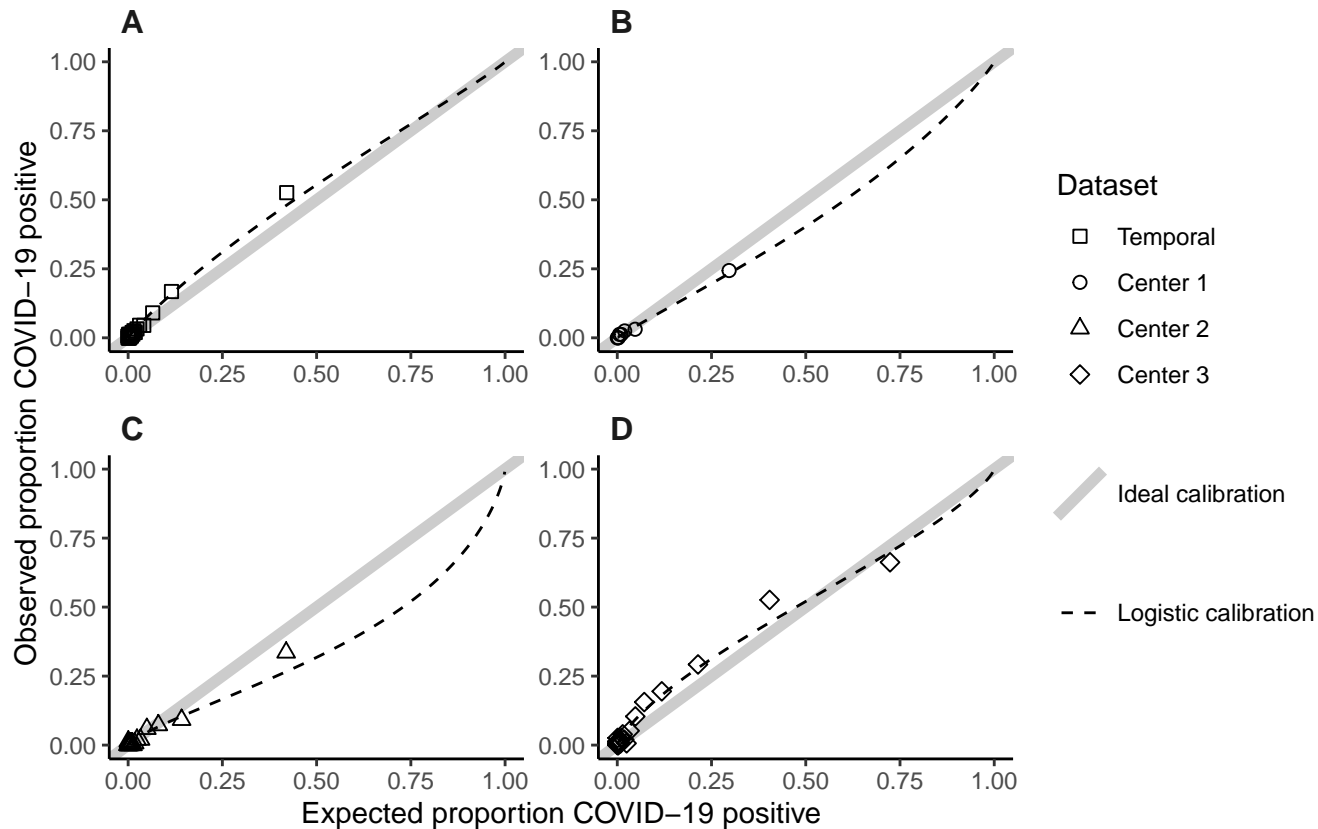

Source: https://medrxiv.org/content/10.1101/2024.01.30.24301996.full.pdf
